# Supplementary material for: Analysis of the Putative Nucleoporin POM33 in the Filamentous Fungus Sordaria macrospora
Source: MDPI journal article supplement (doi:10.3390/jof7090682), 2021-08-24
Supplement: s1 [file s1]

## Supplementary material

**Table S1: List of plasmids**

| Plasmid               | Feature                                                                                                                                                             | Reference                       |
|-----------------------|---------------------------------------------------------------------------------------------------------------------------------------------------------------------|---------------------------------|
| pRS426                | <i>amp<sup>R</sup>, ura3</i>                                                                                                                                        | [1]                             |
| pCB1003               | <i>amp<sup>R</sup>, hph<sup>R</sup></i>                                                                                                                             | [2]                             |
| pRS-nat               | <i>amp<sup>R</sup>, ura3, nat<sup>R</sup></i>                                                                                                                       | [3]                             |
| pRS-hyg               | <i>amp<sup>R</sup>, ura3, hyg<sup>R</sup></i>                                                                                                                       | [4]                             |
| pGG-nat1              | <i>amp<sup>R</sup> BsaI (5)::PtrpC::nat1::BsaI (6)</i> in pJet1.2                                                                                                   | [5]                             |
| pDest-Amp             | Destination vector for Golden Gate cloning; <i>bla</i> ( <i>Bsamut</i> ), <i>lacZ</i> gene with two internal <i>BsaI</i> sites: <i>BsaI</i> (4) and <i>BsaI</i> (7) | [5]                             |
| p1783-1               | <i>amp<sup>R</sup>, ura3, hyg<sup>R</sup><br/>Pgpd::egfp::TtrpC</i>                                                                                                 | [6]                             |
| pRH2B                 | <i>amp<sup>R</sup>, ura3, hyg<sup>R</sup><br/>Pgpd::hh2b::tdTomato::TtrpC</i>                                                                                       | [7]                             |
| pTagRFP-T_nat         | <i>amp<sup>R</sup>, nat<sup>R</sup><br/>Pccgl::TagRFP-T::TtrpC</i>                                                                                                  | [8]                             |
| p5'sci1gfp_nat        | <i>amp<sup>R</sup>, ura3, nat<sup>R</sup><br/>Psci1::sci1::egfp::TtrpC</i>                                                                                          | [9]                             |
| pPRO11-GFP_hyg        | <i>amp<sup>R</sup>, ura3, nat<sup>R</sup><br/>Pccgl::HA::pro11::egfp::TtrpC</i>                                                                                     | Herzog & Pöggeler (unpublished) |
| pSmPOM152GFP          | <i>amp<sup>R</sup>, ura3, nat<sup>R</sup><br/>Pccgl::pom152::egfp::TtrpC</i>                                                                                        | [9]                             |
| p5'nca1-TagRFP-T_nat  | <i>amp<sup>R</sup>, ura3, nat<sup>R</sup><br/>Pnca1::nca1::TagRFP-T::TtrpC</i>                                                                                      | Reschka (unpublished)           |
| p5'nca1-TagRFP-T_hyg  | <i>amp<sup>R</sup>, ura3, hyg<sup>R</sup><br/>Pnca1::nca1::TagRFP-T::TtrpC</i>                                                                                      | Werner (unpublished)            |
| pRSku80::hph          | <i>amp<sup>R</sup>, ura3<br/>5'-flanking region and 3'-flanking region of ku80 interrupted by hph<sup>R</sup> in pRS426</i>                                         | This study                      |
| p5'sci1-egfp_hyg      | <i>amp<sup>R</sup>, ura3, hyg<sup>R</sup><br/>Psci1::sci1::egfp::TtrpC</i>                                                                                          | This study                      |
| p5'pom33-egfp         | <i>amp<sup>R</sup>, ura3, nat<sup>R</sup><br/>Ppom33::pom33::egfp::TtrpC</i>                                                                                        | This study                      |
| p5'pom33-TagRFP-T_nat | <i>amp<sup>R</sup>, ura3, nat<sup>R</sup><br/>Ppom33::pom33::TagRFP-T::TtrpC</i>                                                                                    | This study                      |
| p5'pom33-TagRFP-T_hyg | <i>amp<sup>R</sup>, ura3, hyg<sup>R</sup><br/>Ppom33::pom33::TagRFP-T::TtrpC</i>                                                                                    | This study                      |

|           |                                                                                                                        |            |
|-----------|------------------------------------------------------------------------------------------------------------------------|------------|
| pPom33-KO | <i>amp<sup>R</sup>, 5'-flanking region and 3'-flanking region of pom33 interrupted by nat<sup>R</sup> in pDest-Amp</i> | This study |
|-----------|------------------------------------------------------------------------------------------------------------------------|------------|

*nat<sup>R</sup>*: nourseothricin resistant, *hyg<sup>R</sup>*: hygromycin resistant, *amp<sup>R</sup>*: ampicillin resistance, *ura3*: orotidine-5'-phosphate decarboxylase gene of *Saccharomyces cerevisiae*, *nat*: nourseothricin acetyltransferase gene, *hph*: hygromycin B phosphotransferase gene, *Pccg1*: promotor of the *clock controlled gene 1* of *Neurospora crassa*, *Pgpd*: promotor of the glyceraldehyde-3-phosphate dehydrogenase gene of *Aspergillus nidulans*, *TtrpC*: terminator of the anthranilate synthase gene of *A. nidulans*, *5'*: native promotor of the respective gene, *egfp*: gene for green fluorescent protein enhanced green fluorescent protein (eGFP) of *Aequoria victoria*, *TagRFP-T*: gene for red fluorescent protein TagRFP-T of *Entacmaea quadricolor*. *P*: promoter, *T*: terminator

**Table S2: Primers used in this study**

| Oligo name      | Sequence (5' → 3')                                           |
|-----------------|--------------------------------------------------------------|
| 5'sci1-f        | <i>GTAACGCCAGGGTTTTCCCAGTCACGACG</i><br>GCTAGCTATCAACATCATCG |
| pRS426GFPprev   | <i>GCGGATAACAATTTCACACAGGAAACAGC</i><br>TCGAGTGGAGATGTGGAGTG |
| Smpom33-f       | <i>GTAACGCCAGGGTTTTCCCAGTCACGACG</i><br>TGTTCTTACCTATGACCGTC |
| Smpom33-egfp-r  | <i>GTGAACAGCTCCTCGCCCTTGCTCACCAT</i><br>GGAGGTCTTCTTGGGGGCAG |
| RFP-f           | ATGGTGTCTAAGGGCGAAGAG                                        |
| Smpom33-RFP-r   | <i>TTAATCAGCTCTTCGCCCTTAGACACCAT</i><br>GGAGGTCTTCTTGGGGGC   |
| Pom33-GG-ko-5f  | <i>GACTGGTCTCA AGTC</i> TCATGTCAATGATATGGTTGG                |
| Pom33-GG-ko-5r  | <i>CAGAGGTCTCA GCAG</i> AACGGAAGAGCTGGGCGTTTT                |
| Pom33-GG-ko-3f  | <i>GTACGGTCTCG GTCA</i> TAAGTTGTCGGCTATTGCCGA                |
| Pom33-GG-ko-3r  | <i>CTCAGGTCTCC CGTA</i> GACTGCTGAGTGACACAGCCG                |
| GG_KO_fw        | TAGGGCGAATTGGGTACCG                                          |
| GG_KO_rv        | GGCCGCTCTAGAACTAGTG                                          |
| Pom33-v2f       | ATGGGGGATCAACAGCAACA                                         |
| Smpom33-vORF3-f | GTCATCCTCTTCCAGCGC                                           |
| Pom33-v2r       | TCTTTTTAGCCTGAACAAGTTG                                       |
| ku80-5f         | <i>GTAACGCCAGGGTTTTCCCAGTCACGACG</i><br>GGCAATGGGGGCCAGAACCA |

|              |                                                                     |
|--------------|---------------------------------------------------------------------|
| ku80-5-hyg-r | <b><i>CAAAAAATGCTCCTTCAATATCAGTTAAC</i></b><br>GAGGGAGCTGTTCGTTACAG |
| ku80-3-hyg-f | <b><i>GAGTAGATGCCGACCGGGAACCAGTTAAC</i></b><br>TACGCGCCCATCGATGACGT |
| ku80-3r      | <b><i>GCGGATAACAATTTACACAGGAAACAGC</i></b><br>ACTGAGGTGGCCCAAATCAG  |
| hph-f        | GTAACTGATATTGAACGAGCATTTTTGG                                        |
| hph-r        | GTAACTGGTTCCTCGGTCGGCATCTACTC                                       |
| ku80-ko-v5f  | CTTCATACACTTGGTAGTAGC                                               |
| tC1          | CACCGCCTGGACGACTAAACC                                               |
| h3           | GTACTCGCCGATAGTGGAAC                                                |
| ku80-r       | GTTCGATCCCCACATTATTAAGCAT                                           |
| ku80-1r      | GTTCGATCCCCACATTATTAAGCAT                                           |
| ku80-1f      | ATGGCGGACAAGGAAGCCATCG                                              |
| ku80-ko-v5r  | CTATCAGAAGCTGGCGATAAC                                               |
| ku80-ko-v3f  | CACGTACCTCACGGAAC TCAA                                              |

Bold italics = overhangs

**Table S3: Perseus 1.6.0.7 workflow**

| Step | Subgroup                                                                                                                                                                                                   | Command                                         | Description                                                                                                                                                                                                                                                                                                                                      |
|------|------------------------------------------------------------------------------------------------------------------------------------------------------------------------------------------------------------|-------------------------------------------------|--------------------------------------------------------------------------------------------------------------------------------------------------------------------------------------------------------------------------------------------------------------------------------------------------------------------------------------------------|
| 1    | <i>Load</i>                                                                                                                                                                                                | Generic matrix upload                           | Upload proteingroups.txt<br>Main: LFQ intensities<br>Numerical: MS/MS counts, Mol. Weight, score, peptides, razor + unique peptides, unique peptides, sequence coverage, intensity, number of proteins, sequence length, majority protein IDs, Protein IDs and oxidation (M) site positions. Parameters were loaded for every individual sample. |
| 2    | <i>Processing</i>                                                                                                                                                                                          | Filter rows based on categorical column         | Remove matching rows with + for Only identified by site, Reverse and Potential contaminant                                                                                                                                                                                                                                                       |
| 3    |                                                                                                                                                                                                            | Rearrange                                       | Remove empty columns                                                                                                                                                                                                                                                                                                                             |
| 4    |                                                                                                                                                                                                            | Transform                                       | LFQ intensities = $\log_2(x)$                                                                                                                                                                                                                                                                                                                    |
| 5    | <i>Analysis</i>                                                                                                                                                                                            | Analysis                                        | Multi scatter plot<br>Numeric Venn diagram                                                                                                                                                                                                                                                                                                       |
| 6    | <i>Processing</i>                                                                                                                                                                                          | Categorical annotation rows                     | Groups: TagRFP-T control and examined POM33-TagRFP-T strains                                                                                                                                                                                                                                                                                     |
| 7    |                                                                                                                                                                                                            | Filter rows based on valid values               | Min. valids: 7<br>Mode: In total<br>Values should be: Valid<br>Filter mode: Reduce matrix                                                                                                                                                                                                                                                        |
| 8    |                                                                                                                                                                                                            | Replace missing values from normal distribution | Width: 0.3<br>Down shift: 1.8<br>Mode: Total matrix                                                                                                                                                                                                                                                                                              |
| 9    | <i>Analysis</i>                                                                                                                                                                                            | Analysis                                        | Volcano plot<br>First group (right): POM33-TagRFP-T<br>Second group (left): TagRFP-T control<br>Test: t-test<br>Side: Both<br>Number of randomizations: 250<br>Preserve grouping in randomizations: None<br>FDR: 0.01<br>S0: 0.1                                                                                                                 |
| 10   | Repeat Step 8 and 9 four times                                                                                                                                                                             |                                                 |                                                                                                                                                                                                                                                                                                                                                  |
| 11   | Significant interaction partners are loaded in the online program Venny2.1 [10] and a list of replicates found in all 4 repetitions of the statistical analysis as significant (Step 8 and 9) is generated |                                                 |                                                                                                                                                                                                                                                                                                                                                  |
| 12   | <i>Analysis</i>                                                                                                                                                                                            | Analysis                                        | Select rows with significant hits found in all four repetitions as co-enriched with the bait based on the result of step 11<br>Export selection (reduce matrix)                                                                                                                                                                                  |
| 13   | <i>Processing</i>                                                                                                                                                                                          | Imputation                                      | Replace imputed values by NaN                                                                                                                                                                                                                                                                                                                    |
| 14   |                                                                                                                                                                                                            | Rearrange                                       | Sort by column: LFQ intensity POM33-TagRFP-T_6<br>Descending: put a tick                                                                                                                                                                                                                                                                         |

|    |  |                                       |                                                            |
|----|--|---------------------------------------|------------------------------------------------------------|
| 15 |  | Copy Matrix                           | Paste Matrix into Excel, see Figure S7                     |
| 16 |  | Select representative<br>Volcano Plot | Label significant partners (found in all 4<br>repetitions) |

**A**

| Transmembrane Nucleoporins<br>(TM Nups) |                   |                 |
|-----------------------------------------|-------------------|-----------------|
| <i>S. cerevisiae</i>                    | <i>H. sapiens</i> | <i>S. pombe</i> |
| -                                       | Gp210             | -               |
| Pom152p                                 | -                 | Pom152p         |
| Pom34p                                  | -                 | Pom34p          |
| Ndc1p                                   | Ndc1              | Cut11p          |
| -                                       | Pom121            | -               |
| <b>Pom33p</b>                           | <b>TMEM33</b>     | <b>Tts1p</b>    |

**B**

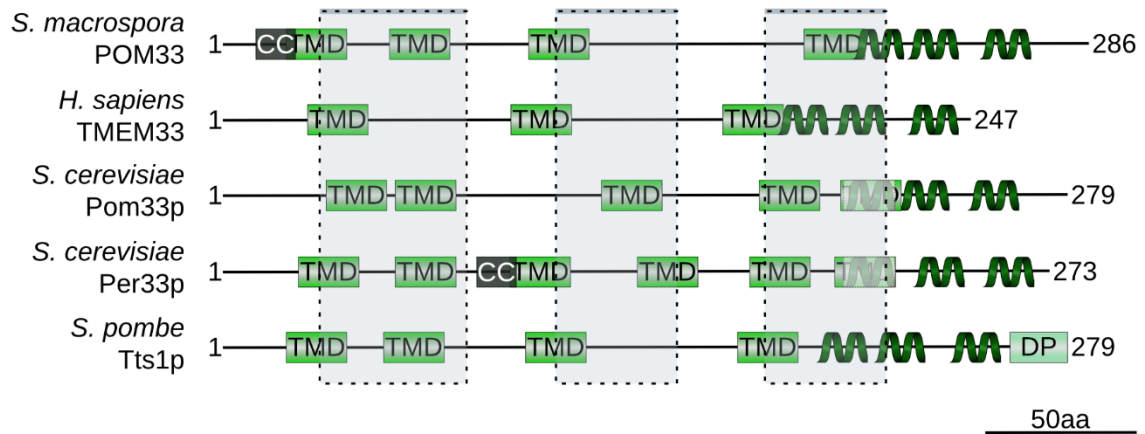

**Figure S1: Transmembrane Nucleoporins and domain organization of POM33 orthologs and paralogues in human and fungi.** (A) Transmembrane nucleoporins (TM Nups) so far known in *S. cerevisiae*, *H. sapiens* and *S. pombe*. In *S. cerevisiae* and *S. pombe* these are Pom152p/ Pom152, Pom34p/ Pom34, Ndc1p/ Cut11, and the newly identified Pom33p/ Tts1p, respectively. In *H. sapiens*, Gp210, Ndc1, Pom121 and TMEM33 belong to TM Nups. (B) Using the program InterProScan [11] transmembrane domains (TMD), indicated in neon green, and a disorder prediction (DP) domain for *S. pombe* Tts1p shown in light green, were predicted. The coiled-coil (CC) motifs, shown in black, were predicted using NPS@: COILED-COILS PREDICTION [12] and helices shown in dark green with the program NetSurfP – 2.0 [13]. Grey shaded boxes indicate positions of three hydrophobic regions each potentially fitting two TMDs after [14]. Accession numbers of the proteins are as following: *S. macrospora* POM33 (XP\_003349881.1), *H. sapiens* TMEM33 (NP\_060596.2), *S. cerevisiae* Pom33p (NP\_013077.1) and its paralogue Per33p (NP\_013165.1) and *S. pombe* Tts1p (NP\_596818.1).

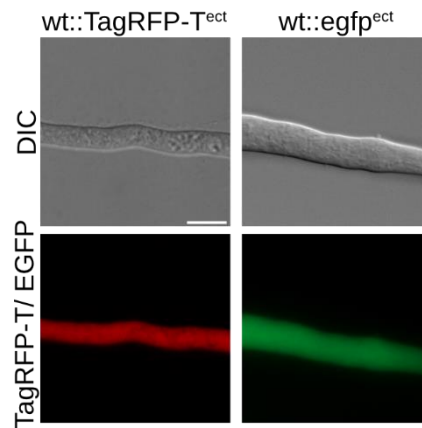

**Figure S2: Localization of free TagRFP-T and EGFP.** Fluorescence microscopic analysis of *S. macrospora* wt strain carrying pTagRFP-T<sub>nat</sub> (*TagRFP-T* under control of the *Neurospora crassa ccg1* promotor [8]) or p1783-1 (*egfp* under control of the *A. nidulans gpd* promotor [6]). DIC, differential interference contrast. Scale bar = 10  $\mu$ m.

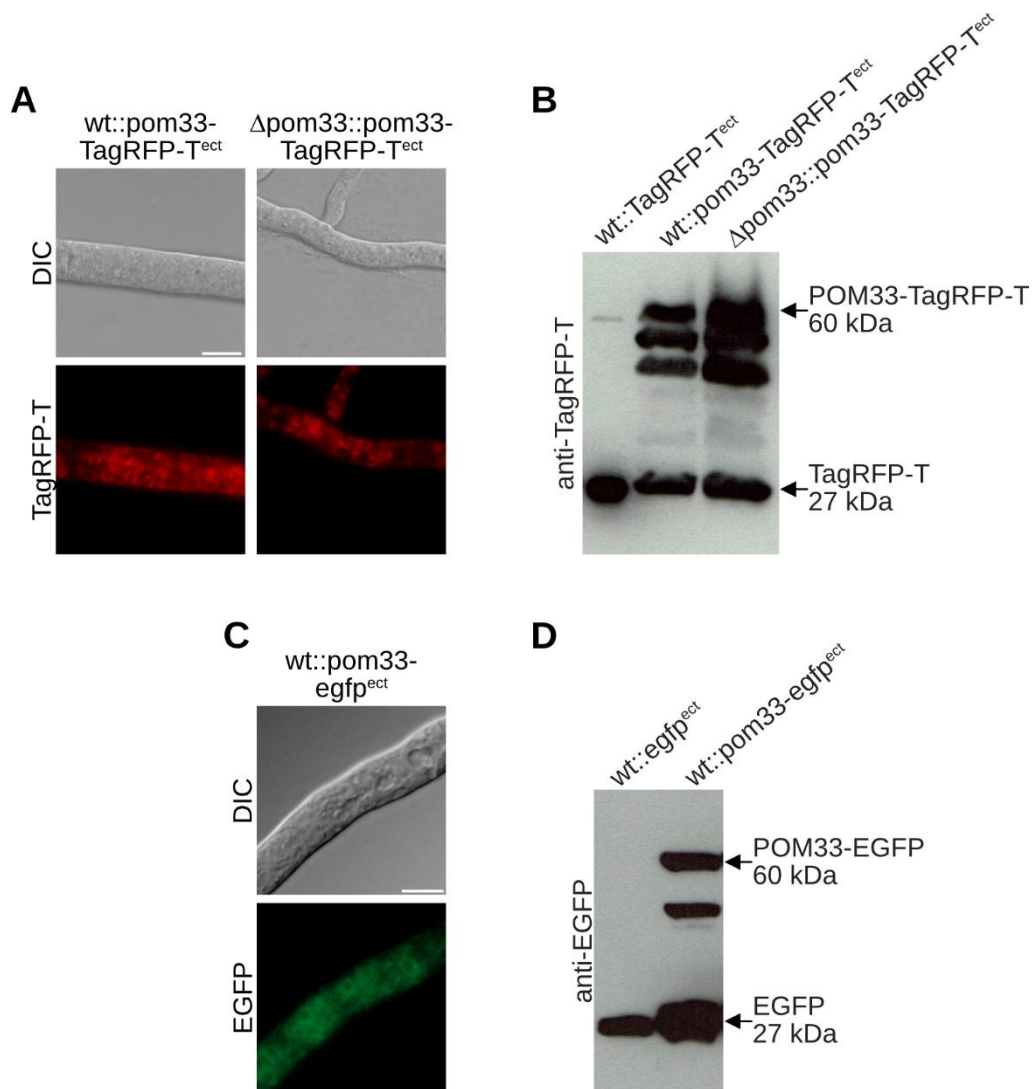

**Figure S3: Fluorescence microscopy of POM33-TagRFP-T/-EGFP and expression controls via Western blot analysis.** Fluorescence microscopic analysis of *S. macrospora* wt and Δpom33 expressing either POM33-TagRFP-T (A) or POM33-EGFP (C) and corresponding Western blot analyses (B & D) are shown. The strains wt::TagRFP-T<sup>ect</sup> or wt::egfp<sup>ect</sup> served as controls. Protein sizes are indicated. Degradation products of POM33 fusion constructs are visible in B & D. DIC, differential interference contrast. Scale bar = 10 μm.

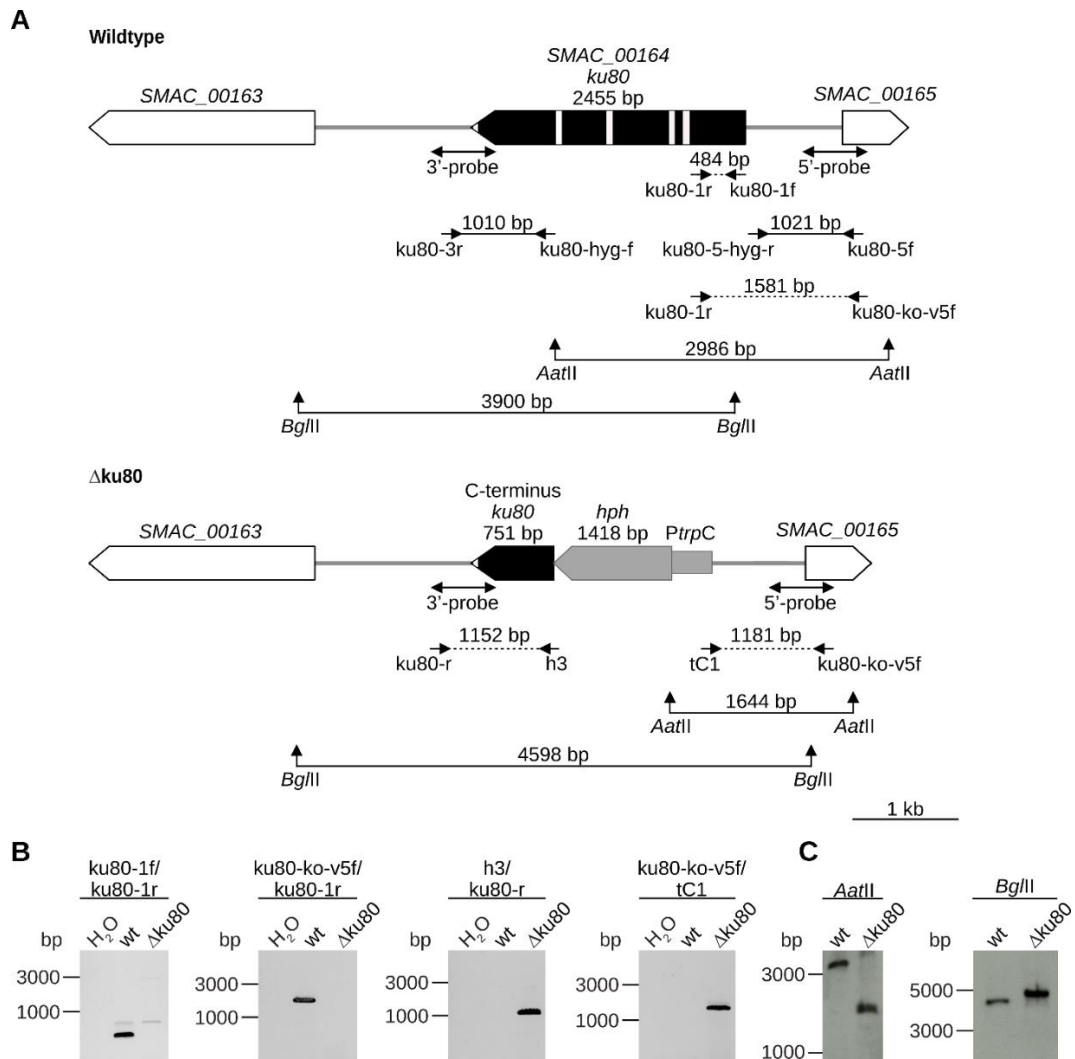

**Figure S4: Verification of *Smku80* deletion by PCR and Southern blot analyses.** (A) Schematic representation of the *Smku80* ORF *SMAC\_00164* (black arrow) with 5 introns (white boxes). White arrows indicate adjacent ORFs. After homologous recombination, the *hph* cassette replaced most of the *Smku80* ORF. Primer combinations, the corresponding fragment sizes, probes for Southern hybridization and hybridization regions are indicated. (B) PCR verification of the homologous integration of the *hph* cassette into the *Smku80* locus. Genomic DNA was isolated from the wt and  $\Delta ku80$  strain and tested with given primer combinations. Water serves as negative control. (C) Confirmation of the *Smku80* deletion was performed by Southern blot. The probe for the 3' flank was PCR amplified with primer pair ku80-ko-v3f x ku80-r and for the 5' flank with primer pair ku80-ko-v5f x ku80-ko-v5r. The isolated genomic DNA was hydrolyzed with *AatII* and *BglII*, respectively. Signals detected correspond to the fragment size of 3.0 kb and 3.9 kb for the wt and 1.6 and 4.6 kb for the *ku80* deletion strain.

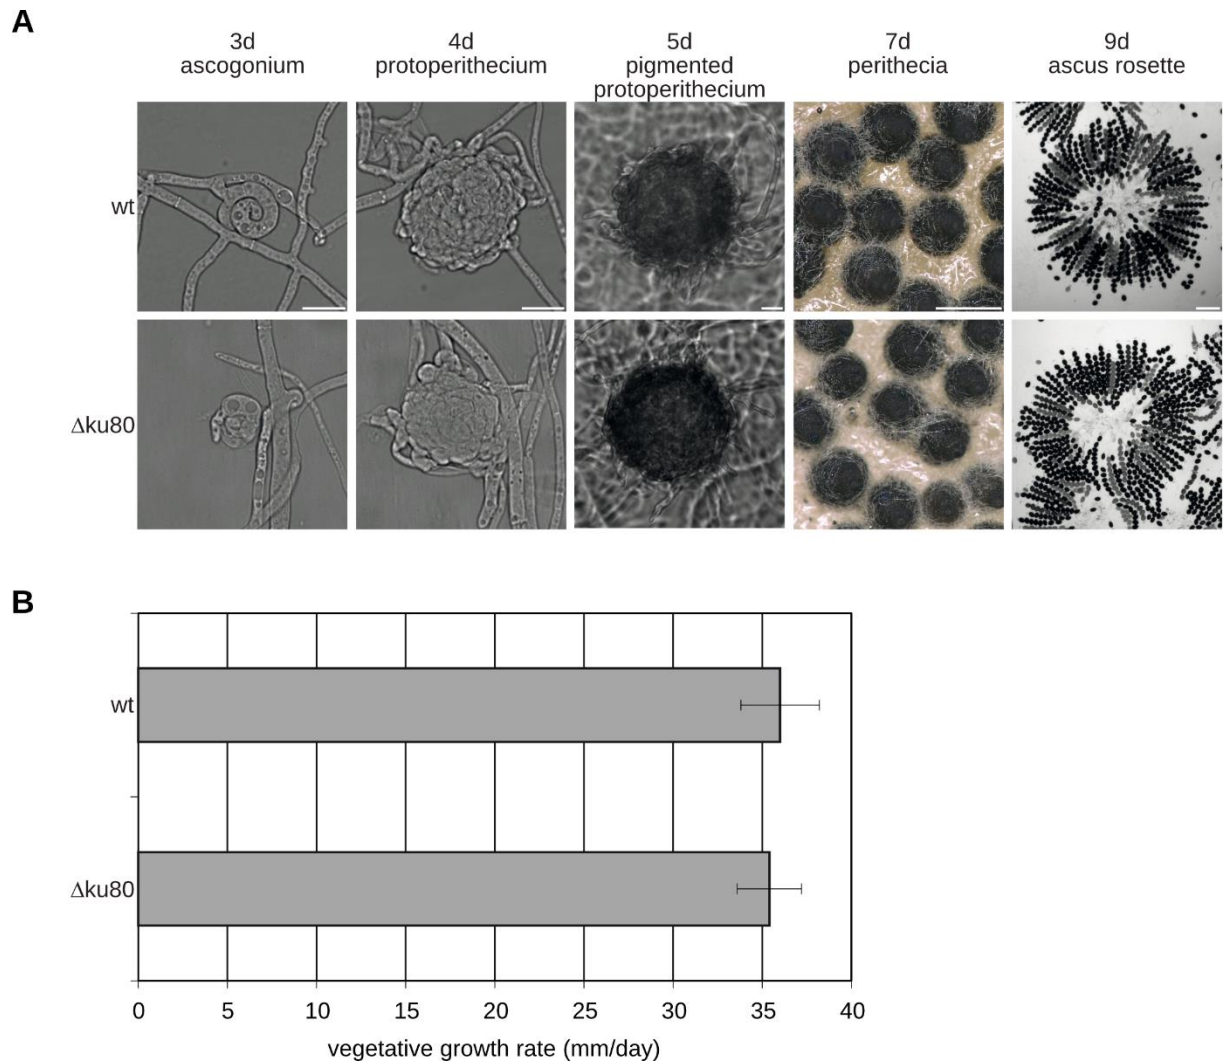

**Figure S5: Sexual development and vegetative growth rates in the  $\Delta ku80$  and wt strain.** (A) Microscopic investigation of wt and  $\Delta ku80$  grown on BMM medium after 3, 4, 5, and seven days of growth. Ascus rosettes isolated from perithecia were recorded after 9 days of growth. (B) Vegetative growth rate was determined after monitored in race tubes. The vegetative growth rate was calculated in mm/d. The standard deviations are represented as error bars. The vegetative growth rate was evaluated from three independent technical replicates performed in triplicates (n=9). Scales bars for A from left to right: 10  $\mu$ m; 10  $\mu$ m; 10  $\mu$ m; 0.5 mm and 100  $\mu$ m.

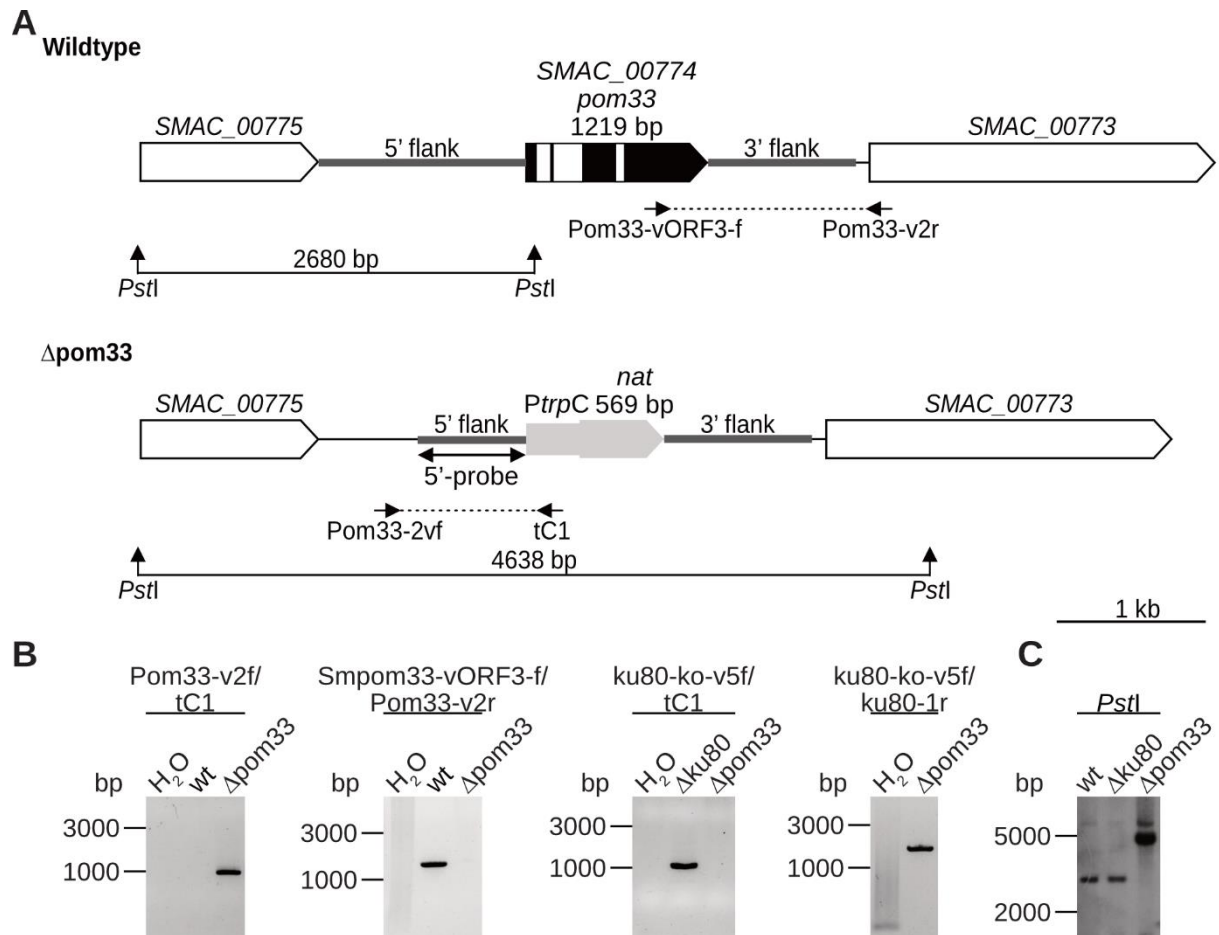

**Figure S6: Verification of *Smpom33* deletion by PCR and Southern blot analyses.** (A) Schematic representation of the *Smpom33* ORF *SMAC\_00774* (black arrow) with 3 introns (white boxes). White arrows indicate adjacent ORFs. After Golden-Gate cloning, the *nat* cassette replaced the *Smpom33* ORF. Primer combinations, the corresponding fragment sizes, probe for Southern hybridization and hybridization regions of *PstI* are indicated. (B) PCR verification of the integration of the *nat* cassette into the *pom33* locus. Genomic DNA was isolated from the wt and Δ*pom33* strain and tested with given primer combinations. Water serves as negative control. (C) Confirmation of the *pom33* deletion was performed by Southern blot. The isolated genomic DNA was hydrolyzed with the enzyme *PstI*. Signals detected correspond to the fragment size of 2680 bp the wt and Δ*ku80* strain and 4638 bp for the *pom33* deletion strain.

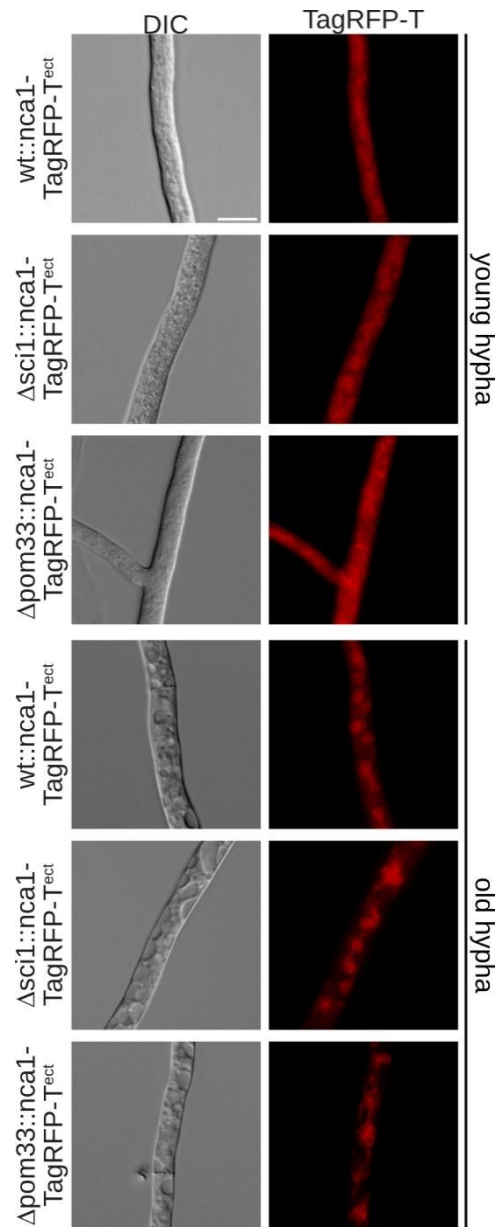

**Figure S7: Localization of the ER-marker NCA1-TagRFP-T in the *S. macrospora* wt,  $\Delta$ pom33 and  $\Delta$ sci1 strain.** Fluorescence microscopic investigation of the *Tag-RFP-T* tagged ER-marker gene *Smnca1* in the wt,  $\Delta$ pom33 and  $\Delta$ sci1 strain in young and old hyphae. Scale bar = 10  $\mu$ m. DIC, differential interference contrast.

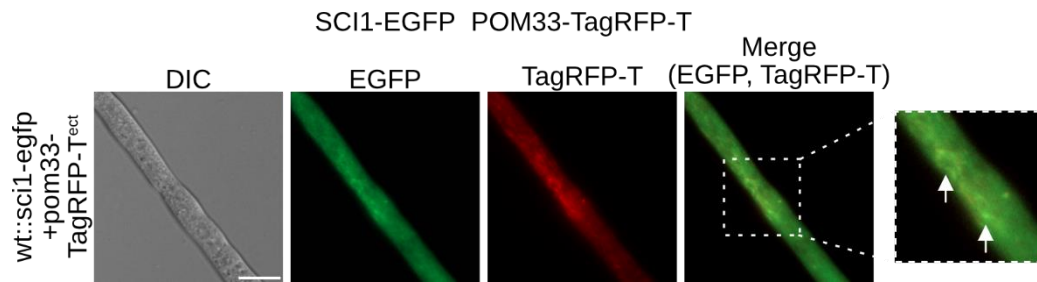

**Figure S8: Co-localization of POM33 and SCI1 in *S. macrospora* wt.** Fluorescence microscopic investigation of *S. macrospora* wt co-expressing POM33-TagRFP-T and SCI1-EGFP.e nucleus. Partial co-localization of the fusion proteins is indicated by white arrows in the margin. Scale bar = 10  $\mu$ m. DIC, differential interference contrast. Detail 2-fold enlargements of the merge pictures are indicated with a dashed frame and shown at the right margin.

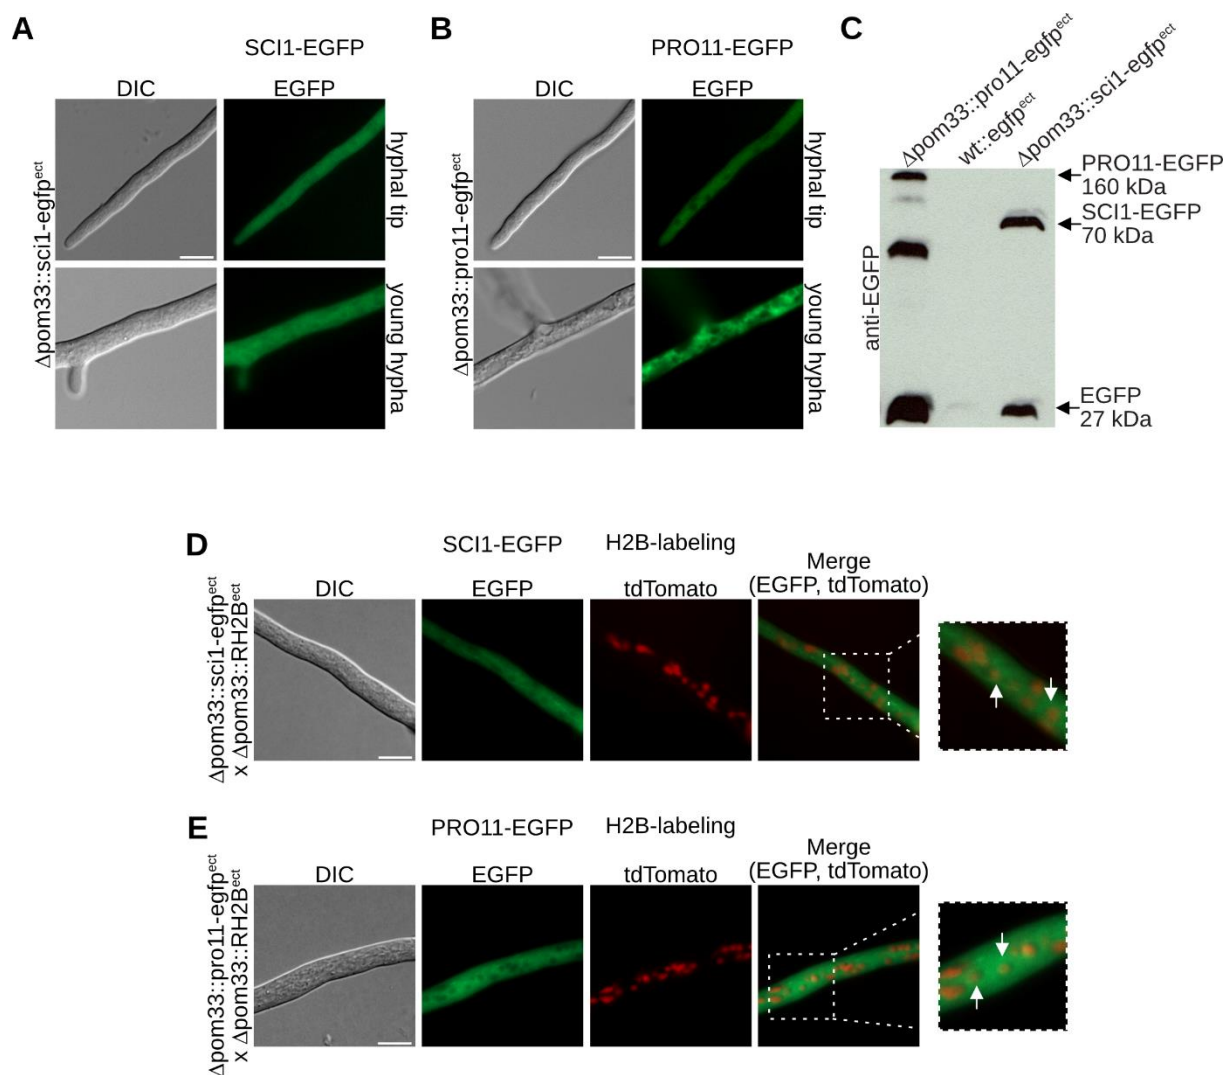

**Figure S9: Localization of SCI1 and PRO11 in  $\Delta pom33$  and Western blot analysis.** Fluorescence microscopic investigation of hyphal tips and young hyphae in  $\Delta pom33$  expressing SCI1-EGFP (**A**) or PRO11-EGFP (**B**). (**C**) Western blot analysis as expression control of the strains, in which wt::egfp<sup>ect</sup> serves as control. Protein sizes are indicated. Degradation products of PRO11-EGFP are visible. Co-localization of SCI1-EGFP (**D**) or PRO11-EGFP (**E**) with histone 2 B labeled with tdTomato (RH2B) in  $\Delta pom33$ . Partial co-localization is indicated by white arrows in the zoom-in picture. Scale bar = 10  $\mu m$ . DIC, differential interference contrast. Detail 2-fold enlargements of the merge pictures are indicated with a dashed frame and shown at the right margin.

## References

1. Christianson, T.W.; Sikorski, R.S.; Dante, M.; Shero, J.H.; Hieter, P. Multifunctional yeast high-copy-number shuttle vectors. *Gene* **1992**, *110*, 119-122, doi:10.1016/0378-1119(92)90454-w.
2. Carroll, A.M.; Sweigard, J.A.; Valent, B. Improved vectors for selecting resistance to hygromycin. *Fungal Genetics Reports* **1994**, *41*, 22.
3. Klix, V.; Nowrousian, M.; Ringelberg, C.; Loros, J.J.; Dunlap, J.C.; Pöggeler, S. Functional characterization of MAT1-1-specific mating-type genes in the homothallic ascomycete *Sordaria macrospora* provides new insights into essential and nonessential sexual regulators. *Eukaryot Cell* **2010**, *9*, 894-905, doi:10.1128/EC.00019-10.
4. Bloemendal, S.; Bernhards, Y.; Bartho, K.; Dettmann, A.; Voigt, O.; Teichert, I.; Seiler, S.; Wolters, D.A.; Pöggeler, S.; Kück, U. A homologue of the human STRIPAK complex controls sexual development in fungi. *Molecular microbiology* **2012**, *84*, 310-323.
5. Dahlmann, T.A.; Terfehr, D.; Becker, K.; Teichert, I. Golden Gate vectors for efficient gene fusion and gene deletion in diverse filamentous fungi. *Current Genetics* **2020**, 1-14.
6. Pöggeler, S.; Masloff, S.; Hoff, B.; Mayrhofer, S.; Kück, U. Versatile EGFP reporter plasmids for cellular localization of recombinant gene products in filamentous fungi. *Current genetics* **2003**, *43*, 54-61.
7. Nordzieke, S.; Zobel, T.; Franzel, B.; Wolters, D.A.; Kück, U.; Teichert, I. A fungal sarcolemmal membrane-associated protein (SLMAP) homolog plays a fundamental role in development and localizes to the nuclear envelope, endoplasmic reticulum, and mitochondria. *Eukaryot Cell* **2015**, *14*, 345-358, doi:10.1128/EC.00241-14.
8. Werner, A.; Otte, K.; Stahlhut, G.; Hanke, L.M.; Pöggeler, S. The Glyoxysomal Protease LON2 Is Involved in Fruiting-Body Development, Ascosporeogenesis and Stress Resistance in *Sordaria macrospora*. *J Fungi (Basel)* **2021**, *7*, 1-17, doi:10.3390/jof7020082.
9. Reschka, E.J.; Nordzieke, S.; Valerius, O.; Braus, G.H.; Pöggeler, S. A novel STRIPAK complex component mediates hyphal fusion and fruiting-body development in filamentous fungi. *Molecular microbiology* **2018**, *110*, 513-532.
10. Oliveros, J.C. VENNY. An interactive tool for comparing lists with Venn Diagrams. **2007-2015**.
11. Blum, M.; Chang, H.Y.; Chuguransky, S.; Grego, T.; Kandasaamy, S.; Mitchell, A.; Nuka, G.; Paysan-Lafosse, T.; Qureshi, M.; Raj, S.; et al. The InterPro protein families and domains database: 20 years on. *Nucleic Acids Res* **2021**, *49*, D344-D354, doi:10.1093/nar/gkaa977.
12. Combet, C.; Blanchet, C.; Geourjon, C.; Deleage, G. NPS@: network protein sequence analysis. *Trends in biochemical sciences* **2000**, *25*, 147-150.
13. Klausen, M.S.; Jespersen, M.C.; Nielsen, H.; Jensen, K.K.; Jurtz, V.I.; Sonderby, C.K.; Sommer, M.O.A.; Winther, O.; Nielsen, M.; Petersen, B.; et al. NetSurfP-2.0: Improved prediction of protein structural features by integrated deep learning. *Proteins* **2019**, *87*, 520-527, doi:10.1002/prot.25674.
14. Chadrin, A.; Hess, B.; San Roman, M.; Gatti, X.; Lombard, B.; Loew, D.; Barral, Y.; Palancade, B.; Doye, V. Pom33, a novel transmembrane nucleoporin required for proper nuclear pore complex distribution. *J Cell Biol* **2010**, *189*, 795-811, doi:10.1083/jcb.200910043.
